# Ranking the effectiveness of worldwide COVID-19 government interventions

Nils Haug<sup>1,2,\*</sup>, Lukas Geyrhofer<sup>2,\*</sup>, Alessandro Londei<sup>3,\*</sup>, Elma Dervic<sup>1,2</sup>, Amélie Desvars-Larrive<sup>2,4</sup>,  
Vittorio Loreto<sup>3,2,5</sup>, Beate Pinior<sup>2,4</sup>, Stefan Thurner<sup>1,2,6</sup>, Peter Klimek<sup>1,2,†</sup>

<sup>1</sup>Medical University of Vienna, Section for Science of Complex Systems, CeMSIIS, Spitalgasse 23,  
1090 Vienna, Austria;

<sup>2</sup>Complexity Science Hub Vienna, Josefstädter Straße 39, 1080 Vienna, Austria;

<sup>3</sup>Sony Computer Science Laboratories, 75005 Paris, France;

<sup>4</sup>Unit of Veterinary Public Health and Epidemiology, Institute of Food Safety, Food Technology  
and Veterinary Public Health, University of Veterinary Medicine Vienna, Veterinärplatz 1, 1210  
Vienna, Austria;

<sup>5</sup>Physics Department, Sapienza University of Rome, 00185 Rome, Italy;

<sup>6</sup>Santa Fe Institute, Santa Fe, NM 87501, USA.

\* Equal contributions.

† Correspondence: [peter.klimek@meduniwien.ac.at](mailto:peter.klimek@meduniwien.ac.at)

**Non-pharmaceutical interventions (NPIs) to mitigate the spread of SARS-CoV-2 were often implemented under considerable uncertainty and a lack of scientific evidence. Assessing the effectiveness of the individual interventions is critical to inform future preparedness response plans. Here we quantify the impact of 4,579 NPIs implemented in 76 territories on the**

effective reproduction number,  $R_t$ , of COVID-19. We use a hierarchically coded data set of NPIs and propose a novel modelling approach that combines four computational techniques, which together allow for a worldwide consensus rank of the NPIs based on their effectiveness in mitigating the spread of COVID-19. We show how the effectiveness of individual NPIs strongly varies across countries and world regions, and in relation to human and economic development as well as different dimensions of governance. We quantify the effectiveness of each NPI with respect to the epidemic age of its adoption, i.e., how early into the epidemics. The emerging picture is one in which no one-fits-all solution exists, and no single NPI alone can decrease  $R_t$  below one and that a combination of NPIs is necessary to curb the spread of the virus. We show that there are NPIs considerably less intrusive and costly than lockdowns that are also highly effective, such as certain risk communication strategies and voluntary measures that strengthen the healthcare system. By allowing to simulate “what-if” scenarios at the country level, our approach opens the way for planning the most likely effectiveness of future NPIs.

# 1 Introduction

In the absence of vaccines and antiviral medication, non-pharmaceutical interventions (NPIs) implemented in response to epidemic respiratory viruses are the only option to delay and moderate the spread of the virus in a population [1].

Confronted with the worldwide COVID-19 epidemic, most governments implemented bundles of highly restrictive, sometimes intrusive NPIs. Decisions had to be taken under rapidly changing epidemiological situations, despite a dramatic lack of scientific evidence on the individual and combined effectiveness of these measures [2,3], degree of compliance of the population, and societal impact.

This strategy can be compared with hitting the infection curve with a blunt sledgehammer, hoping that some of the interventions might suppress transmission to a degree that drives the effective reproduction number,  $R_t$  (the average number of new infections caused by one infected individual), below one. The lack of data-driven evidence in support for the implemented NPIs may be best exemplified by the conflicting recommendations on the use of face masks. Both, the World Health Organization (WHO) and the German Robert Koch Institute (RKI) reversed their initial recommendations against masks after new evidence appeared, suggesting that optimum use of face masks is associated with a large reduction in risk of COVID-19 infection [4].

Government interventions may cause significant societal and economic damages and may affect individuals' behaviour, mental health and social security [5]. Therefore, knowledge on the

most effective NPIs would allow stakeholders to judiciously and timely implement a package of key interventions to combat a potential resurgence of COVID-19 or any other future respiratory outbreak. As many countries rolled out several NPIs simultaneously, the challenge of disentangling the impact of each individual intervention arises.

To date, studies of the country-specific progression of the COVID-19 pandemic<sup>[6]</sup> have mostly explored the independent effects of a single category of interventions. These categories include travel restrictions<sup>[2,7]</sup>, social distancing<sup>[8-14]</sup>, or personal protective measures<sup>[11]</sup>. Some studies focused on a single country or even a town<sup>[14-18]</sup>. Some research has combined data from multiple countries but has pooled NPIs into rather broad categories<sup>[10,19]</sup>, which eventually limits the assessment of specific, potentially critical NPIs, that may be less costly and more effective than others.

Using a comprehensive, hierarchically coded, data set of 4,579 NPIs implemented in 76 territories<sup>[20]</sup>, here we analyse the impact of government interventions on  $R_t$ , using harmonised results from a new multi-method approach consisting of (i) a case-control analysis (CC), (ii) a step function approach to LASSO time-series regression (LASSO), (iii) random forests (RF) and (iv) recurrent neural networks (RNN). We also investigate country-based control strategies as well as the impact of some selected country-specific metrics. We finally focus on the highly controversial nation-wide (or state-wide) lockdowns and investigate the relevance of this measure with respect to the timeliness of its implementation.

All approaches (i-iv) yield comparable rankings of the effectiveness of different categories of NPIs across their hierarchical levels. This remarkable agreement allows us to identify a consensus

set of specific NPIs that lead to a significant reduction of  $R_t$ . Further, we evaluate the heterogeneity of the effectiveness of individual NPIs in different territories. We find that time of implementation, already implemented measures, different dimensions of governance, as well as human and social development affect the effectiveness of NPIs to varying degrees.

## 2 Results

**Global approach.** Our results are based on a consolidated version of the CCCSL (CSH COVID19 Control Strategies List) [20]. This data set provides a hierarchical taxonomy of NPIs on four levels: eight broad themes (level 1, L1) are divided into 53 categories of individual NPIs (level 2, L2) that include hundreds of subcategories (level 3, L3) and additional group codes (level 4, L4). In Figure 1 we compare the results for the NPIs' effectiveness rankings for the four methods of our approach (i-iv) on L1 (themes); see Methods for how these ranks were obtained. A clear picture emerges: the themes of social distancing, healthcare & public health capacity, travel restrictions, and risk communication score as the top four intervention types in all methods. Social distancing is the highest ranked theme of NPIs in all but one method.

We next compare results obtained on L2 of the NPI data set, i.e., using the 53 individual NPI categories. A substantial number of interventions has a significant effect on  $R_t$  for the majority of the methods, see Figure 2 and Table 1. Seven NPI categories show significant impacts on  $R_t$  in all four methods (given the number of significant results in each method, we would expect an overlap of 1.65 under completely unrelated results) while three out of four methods identify the

| L1 themes                                                 | CC | LASSO | RF | RNN |
|-----------------------------------------------------------|----|-------|----|-----|
| Social distancing                                         | 1  | 1     | 1  | 3   |
| Healthcare and public health capacity                     | 2  | 2     | 4  | 1   |
| Travel restriction                                        | 4  | 3     | 2  | 2   |
| Risk communication                                        | 3  | 4     | 3  | 4   |
| Resource allocation                                       | 6  | 5     | 5  | 5   |
| Case identification, contact tracing and related measures | 5  | 6     | 6  | 7   |
| Returning to normal life                                  | 8  | 8     | 7  | 6   |
| Environmental measures                                    | 7  | 7     | 8  | 8   |

Figure 1: Comparison of effectiveness rankings on the coarsest hierarchical level for the case-control analysis (CC), LASSO regression (LASSO), random forest regression (RF), and recurrent neural network analysis (RNN). All methods indicate that NPIs belonging to the themes of social distancing, healthcare & public health capacity, risk communication, and travel restrictions lead to the most significant reductions of  $R_t$  (these themes are ranked within the top four themes in all approaches).

same 14 NPI categories as significant. The pairwise Pearson correlations between the methods range between 0.3 and 0.7, with  $p$ -values between  $p = 0.029$  and  $p < 10^{-8}$ . Similar results hold for Spearman's correlation. In Table [S2](#) we list the subcategories (L3) belonging to the seven consensus categories.

A normalised score for each NPI category is obtained by rescaling the result of each method to range between zero (least effective) and one (most effective) and then averaging this score. The maximal (minimal) NPI score is therefore 100% (0%), meaning that the measure is the most (least) effective measure in each method. Amongst the seven consensual NPI categories, the largest impacts on  $R_t$  are displayed by the closure of educational institutions (with a score of 85% and estimates for  $\Delta R_t$  ranging from  $-0.064$  to  $-0.34$ ), small gathering cancellations (72%,  $\Delta R_t$  between  $-0.082$  and  $-0.23$ ) and border restrictions (57%,  $\Delta R_t$  between  $-0.024$  and  $-0.24$ ). We find seven other NPI categories consensually in three of our methods. These include risk communication activities to inform and educate the public (65%,  $\Delta R_t$  between  $-0.066$  and  $-0.31$ ) and mass gathering cancellations (51%,  $\Delta R_t$  between  $-0.032$  and  $-0.27$ ).

In Figure [3](#) we visualise the findings on the NPIs' effectiveness in a co-implementation network [20](#). Nodes correspond to categories (L2) with a size being proportional to their normalised score. Directed links from  $i$  to  $j$  indicate a tendency that countries implement NPI  $j$  after they implemented  $i$ . The network therefore illustrates the typical NPI implementation sequence of the 53 countries and the steps within this sequence that contribute most to a reduction of  $R_t$ . For instance, there is a pattern where countries first cancel mass gatherings before moving on to cancellations

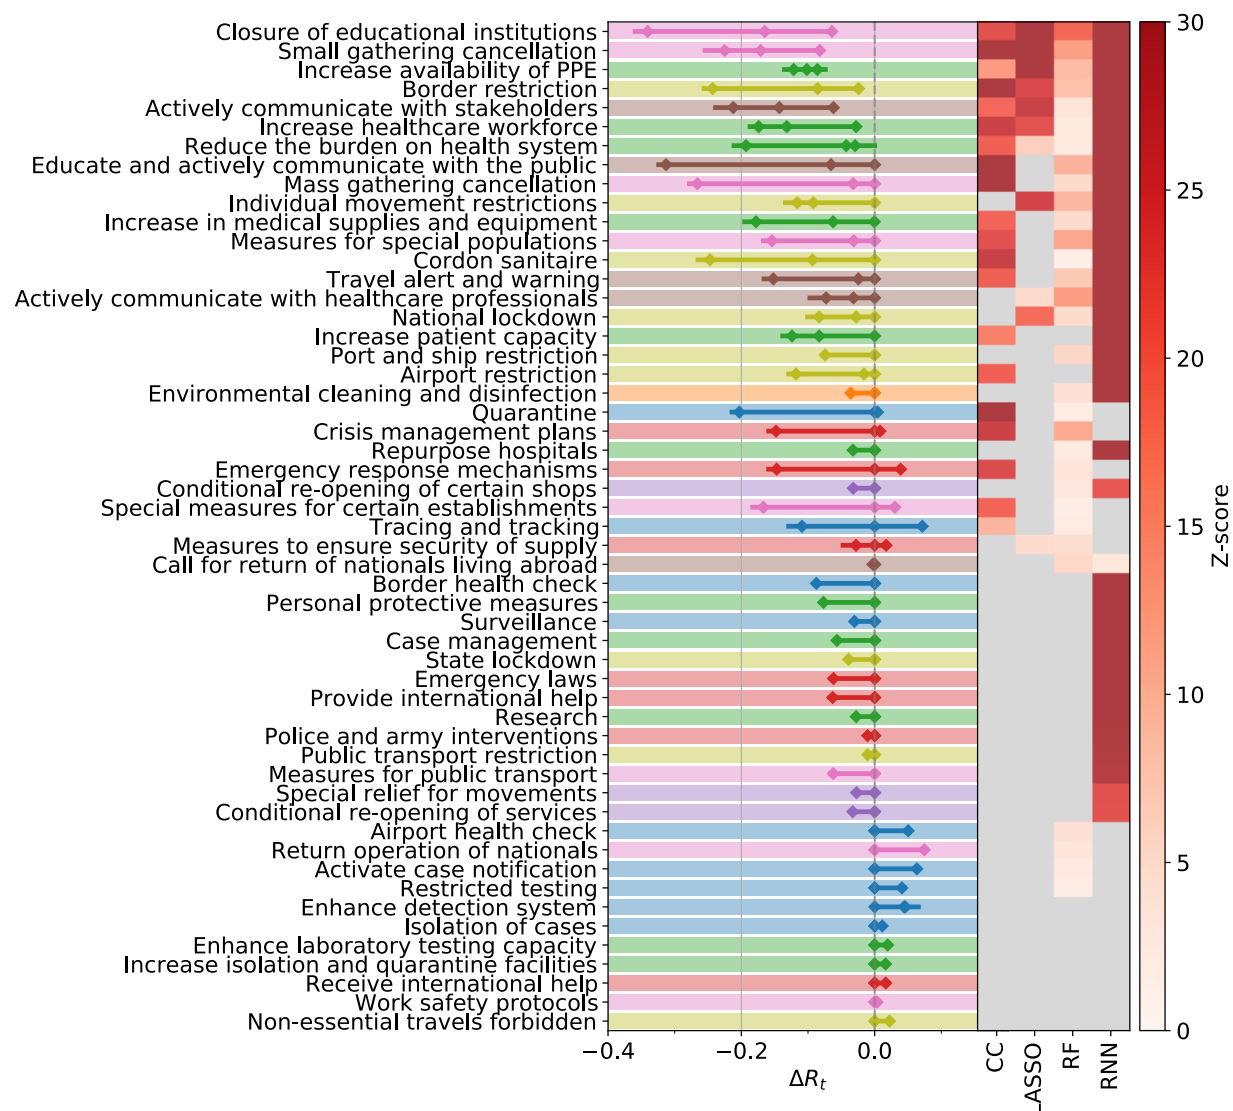

Figure 2: Decrease in the effective reproduction number,  $\Delta R_t$ , for the various NPIs at L2, as quantified by case-control analysis (CC), LASSO, and the recurrent neural network (RNN) regression. The left panel shows the combined 95% confidence interval of  $\Delta R_t$  for the most effective interventions across all included territories. The heatmap in the right panel shows the corresponding Z-scores of the measure effectiveness as determined by the four different methods. NPIs are ranked according to the number of methods agreeing on their impacts, from top (significant in all methods) to bottom (ineffective in all analyses). L1 themes are colour-coded as in Figure 1.



| L2 category                                                  | Score | Consensus | $\Delta R_t^{CC}$ | $\Delta R_t^{LASSO}$ | Importance (RF) | $\Delta R_t^{RNN}$ |
|--------------------------------------------------------------|-------|-----------|-------------------|----------------------|-----------------|--------------------|
| Closure of educational institutions                          | 85%   | 4         | -0.165 (7)        | -0.341 (4)           | 0.033 (3)       | -0.064(1)          |
| Small gathering cancellation                                 | 72%   | 4         | -0.171 (5)        | -0.225 (5)           | 0.018 (3)       | -0.082 (1)         |
| Educate and actively communicate with the public             | 65%   | 3         | -0.313 (6)        | 0                    | 0.012 (2)       | -0.066 (1)         |
| Border restriction                                           | 57%   | 4         | -0.243 (6)        | -0.086 (4)           | 0.010 (2)       | -0.242 (7)         |
| Increase availability of personal protective equipment (PPE) | 56%   | 4         | -0.086 (6)        | -0.122 (3)           | 0.021 (4)       | -0.102 (1)         |
| Mass gathering cancellation                                  | 51%   | 3         | -0.266 (6)        | 0                    | 0.007 (2)       | -0.0322 (8)        |
| Measures for special populations                             | 48%   | 3         | -0.154 (7)        | 0                    | 0.013 (2)       | -0.0315 (9)        |
| Increase healthcare workforce                                | 43%   | 4         | -0.174 (7)        | -0.132 (6)           | 0.004 (3)       | -0.0279 (9)        |
| Actively communicate with stakeholders                       | 43%   | 4         | -0.143 (7)        | -0.212 (8)           | 0.003 (2)       | -0.062 (1)         |
| Individual movement restrictions                             | 43%   | 3         | 0                 | -0.116 (5)           | 0.032 (6)       | -0.092 (1)         |
| Increase in medical supplies and equipment                   | 40%   | 3         | -0.178 (9)        | 0.000 (2)            | 0.009 (3)       | -0.062 (1)         |
| Reduce the burden on health system                           | 35%   | 4         | -0.193 (9)        | -0.043 (6)           | 0.003 (2)       | -0.029 (1)         |
| Cordon sanitaire                                             | 35%   | 3         | -0.247 (9)        | 0                    | 0.002 (1)       | -0.093 (2)         |
| National lockdown                                            | 30%   | 3         | 0                 | -0.083 (4)           | 0.010 (3)       | -0.028 (1)         |

Table 1: Comparison of effectiveness rankings on L2. Out of the 53 different NPI categories, all four methods show significant results for seven NPIs (consensus 4); three methods agree on seven further NPIs (consensus 3). We report the average normalized score, the observed reduction in  $R_t$  for the various methods and the NPI importance for the random forest. The numbers in brackets give the amount by which the last digit of the corresponding number outside the brackets fluctuates within the 95% confidence interval.

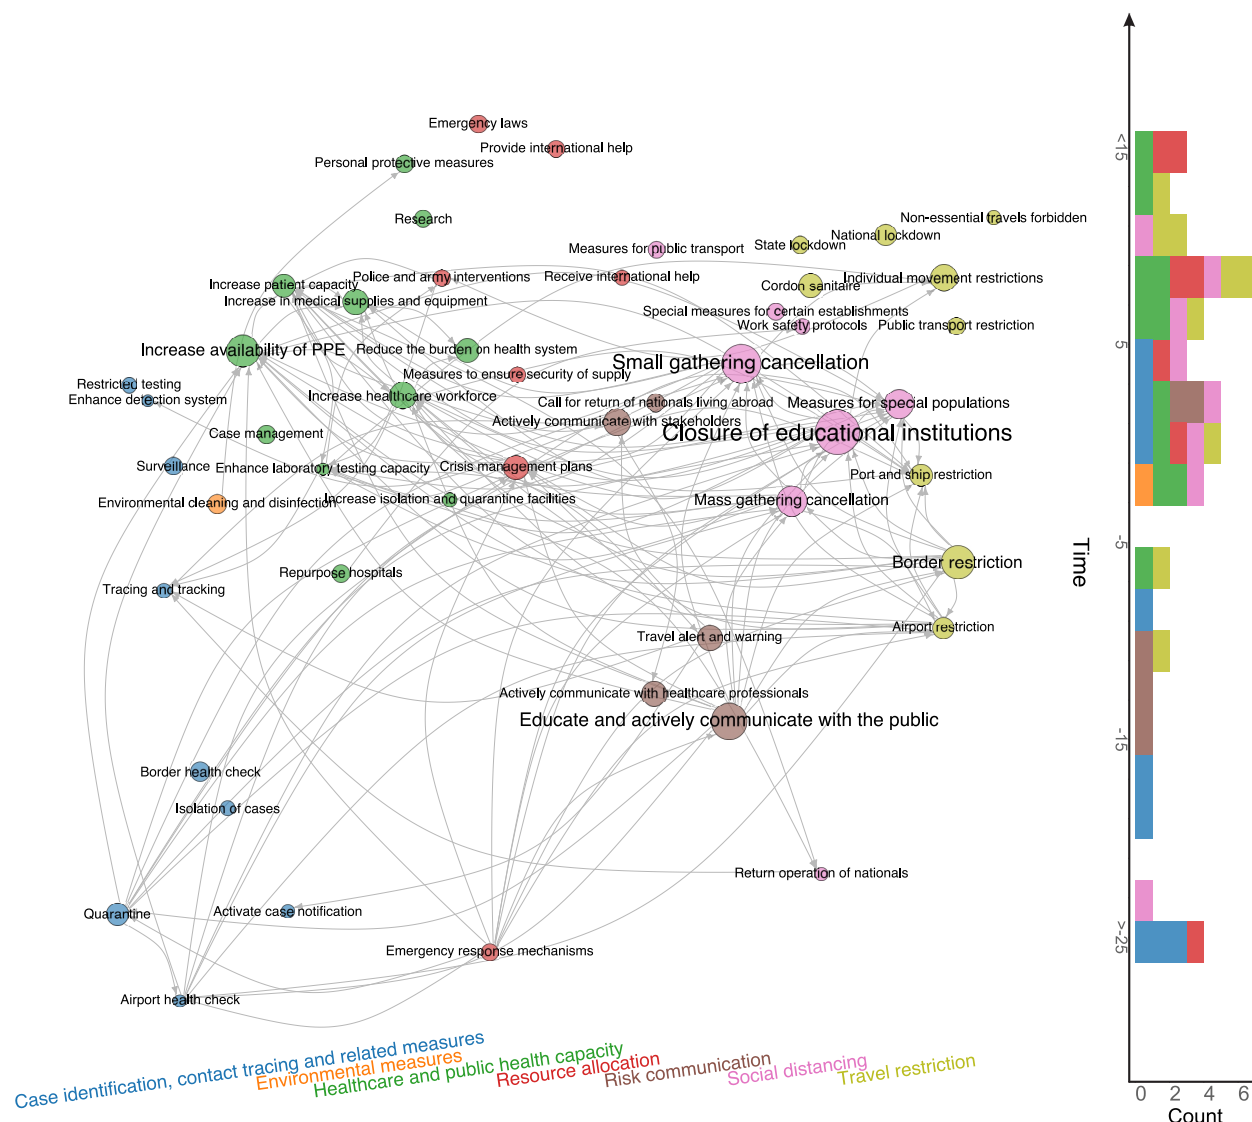

Figure 3: Time-ordered NPI co-implementation network across countries. Nodes are categories (L2) with colour indicating the theme (L1) and size being proportional to the average effectiveness of the intervention. Arrows from nodes  $i$  to  $j$  represent that countries which have already implemented intervention  $i$  tend to implement intervention  $j$  later in time. Nodes are positioned vertically according to their average time of implementation (measured relative to the day where the country reached 30 confirmed cases) and horizontally according to their L1 theme.

of specific types of small gatherings, where the latter associates on average with more substantial reductions in  $R_t$ . Education and active communication is a powerfully effective early measure (implemented around 15 days before 30 cases were reported). Most social distancing and travel restriction measures (i.e., closure of educational institutions, work safety protocols, cordon sanitaire, individual movement restrictions, complete lockdown) are typically implemented within the first two weeks after reaching 30 cases with varying impacts; see also Figure 2.

By analysing the third and fourth levels of the coding hierarchy, the CC approach makes it possible to assess the effectiveness of NPIs related to the use of face masks. Increasing the availability of face masks for healthcare professionals shows a significant impact on the  $R_t$  ( $\Delta R_t = -0.07(1)$ ). There is also a considerable effect of communicating with the public and promoting the use of face masks ( $\Delta R_t = -0.19(2)$ ). However, their mandatory use in public settings shows a weaker effect ( $\Delta R_t = -0.13(3)$ ). These three mask-related NPIs have typically been implemented at different times of the epidemic. Promoting the use of face masks started on average three days after 30 cases were counted in a country, measures to increase their availability in healthcare settings were implemented 11 days afterwards, and the mandatory use of face masks in public environments came 22 days later.

**Country-level approach.** A sensitivity check of our results with respect to the removal of individual continents from the analysis also indicates substantial variations between different regions of the world in terms of NPI effectiveness, see SI. To further quantify how much the effectiveness of an NPI depends on the particular territory (country or US state) where it has been introduced, we

measure the heterogeneity of the NPI rankings in different territories through an entropic approach in the RNN method; see Methods. Fig. 4 shows the normalised entropy of each NPI category versus its rank. A value of entropy close to zero implies that the corresponding NPI has a similar rank relative to all other NPIs in all territories. In other words, the effectiveness of the NPI does not depend on the specific country or state. On the contrary, a high value of the normalised entropy signals that the same NPI performs very differently in different regions.

The values of the normalised entropies for many NPIs are far from being one and below the corresponding values obtained through a temporal reshuffling of the NPIs in each country. The effectiveness of many NPIs therefore is, first, significant and, second, heavily dependent on the local context, which is a combination of socio-economic features and NPIs already adopted. We further explore this interplay of NPIs with socio-economic factors by analysing the effects of demographic and socio-economic covariates, as well as indicators for governance, human and economic development in the CC method, see Supplementary Information (SI). We find a robust tendency that NPIs are less effective in countries with high levels of human development (as quantified by the Human Development Index), governance-related accountability and political stability (as quantified by World Governance Indicators provided by the World Bank).

We then focus on the whether the efficacy of specific NPI depends on its epidemic age, i.e., how early it was adopted in each specific country. Without loss of generality, here we focus on the NPI of a *National lockdown* (or *State lockdown* in the US) and we refer to the SI for the complete treatment of all the other NPIs. As it is known, the complete lockdown triggered a lot of debates

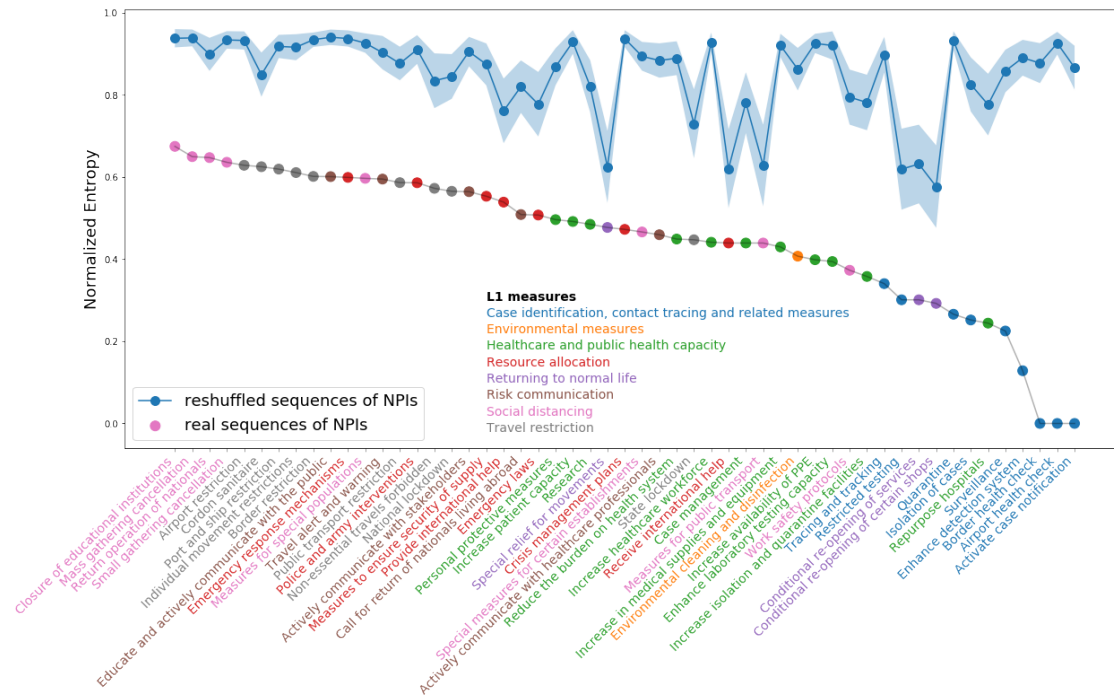

Figure 4: Normalised entropy vs rank for all the NPIs at L2. Each NPI name is coloured according to its theme of belonging (L1) as indicated in the legend. The blue curve represents the same information obtained out of a reshuffled data set of NPIs.

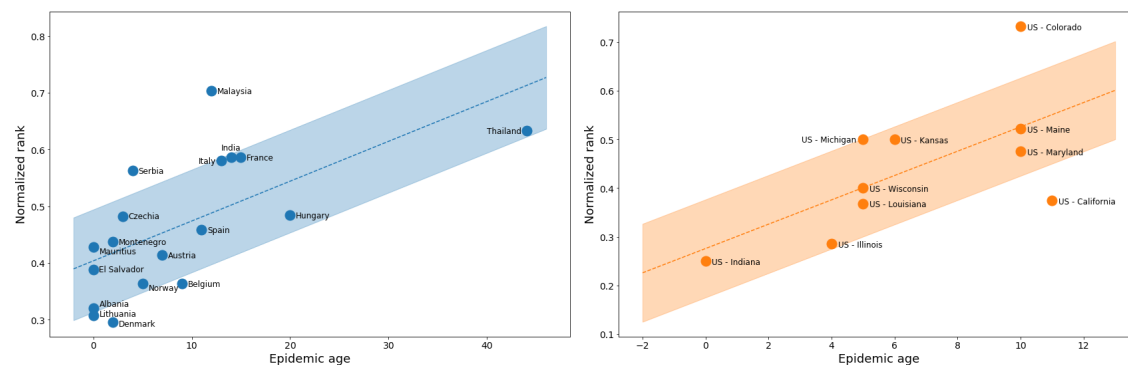

Figure 5: Normalised ranking position of *National lockdown* (left) or *State lockdown* (right) versus the epidemic age (number of days since 30 confirmed cases) of the NPI in each country/state in which it has been adopted. To avoid biases connected to the epidemic age, we compute the ranking from the relative variation of  $R_t$ , i.e.,  $\Delta R_t / R_t$ .

about its efficacy and its real necessity, also considering its level of invasiveness. In the RNN approach, we assess the relative effectiveness of the lockdown measure in different countries. Here relative effectiveness means the relative position in the ranking of a specific country, i.e., the ranking position normalised with the number of NPIs adopted in that country. To this end we repeat the same knockout procedure adopted above to extract the NPI rankings in the framework of the RNN method (see SI) for each country separately and compute, for each country, the normalised ranking position of *National lockdown* (or *State lockdown* in the US). Fig. 5 reports the normalised rank in each country/state as a function of the epidemic age of *National lockdown* (left) or *State lockdown* (right) in that country/state.

There is a strong correlation between the effectiveness of the national/state lockdown and the epidemic age of its implementation. We can conclude that the epidemic age is highly relevant when

national or state lockdown are concerned. A short synthesis for that is "the earlier, the better". We refer to the Supplementary Information for the report of this analysis applied to all NPIs.

### 3 Discussion

To give a better synthesis, in the following, we discuss our main findings organised according to the themes at the top level of NPIs hierarchy.

**Social distancing.** Bans of small gatherings (gatherings of 50 persons or less) and the closure of educational institutions have a more substantial effect on  $R_t$  (but are also more intrusive to our daily lives) than the prohibition of mass gatherings, measures targeting special populations (e.g., elderly, vulnerable populations, hospitalized patients, prisoners or more exposed non-healthcare professionals) or adaptive measures for certain establishments (e.g., places of worship, administrative institutions, entertainment venues, nursing homes). In two recent studies based on smaller numbers of countries, school closures had been attributed only a little effect on the spread of COVID-19 [9,10]. Social distancing measures are less effective in countries with a high population density and a high degree of citizen participation in the government, as well as freedom of expression or free media (WGI Voice & Accountability). The country-level analysis confirms that these NPIs have a particularly high entropy, meaning that their effectiveness varies indeed substantially across countries. An exception to that are the measures for public transport and work safety protocols, where the latter mostly refers to mandatory guidelines for, e.g., physical barriers or fever checks at workplaces. These two social distancing measures have a low effectiveness rank (little significance

across the methods) and low entropy, meaning that they had no impact on  $R_t$  consistently across most countries.

**Healthcare and public health capacity.** An increase in the availability of personal protective equipment (PPE) to the healthcare workforce, together with measures aiming to reduce the number of non-COVID-19 or non-critical COVID-19 patients in medical centres and hospitals (by promoting self-isolation of mildly symptomatic patients, setting up health hotlines, etc.) are also essential building blocks of successful containment strategies. All of these measures combine high effectiveness of early implementation and low entropy, meaning that they are similarly effective in most countries. Consequently, they also show less or no consistent correlations with most of the country-level development or governance indicators. There is one notable exception to this general trend, namely the increased availability of PPE, which positively and strongly correlates with the control of corruption. Indeed, there are increased news reports currently on scandals related to government procurement of PPE <sup>21-23</sup>.

**Travel restrictions.** Different types of travel restrictions also show significant effects, in particular border restrictions (e.g., border closure, border controls), individual movement restrictions (e.g., curfews, the prohibition of non-essential activities) and cordons sanitaires (containment zones). The high effectiveness of border restrictions is driven by European countries (its impact on  $R_t$  turns insignificant in two of our methods after removing all European countries); most likely for geographic reasons. This finding is in line with a high entropy score of border, airport, port and ship as well as individual movement restrictions.



Effectiveness of ultimate measures such as stay-at-home orders or lockdowns is still controversial. Recent studies suggest that a national lockdown reduces  $R_t$  by an average of 5% [9] to 80% [10], whereas other interventions seem to reduce the virus spread by 5% [10] to 30% [9]. In some countries or territories, the effect of a lockdown decided in the late stage of the epidemic may not be more effective than previously implemented bans on gatherings [9,10,24]. Our analysis highlights the importance of early national lockdowns by showing how the relative effectiveness of that measure correlates with the epidemic age of its adoption. However, the reduced effectiveness of lockdowns at higher epidemic age, as observed in Fig. 5, does not necessarily imply that taking this NPI late is useless.

**Risk communication.** In terms of risk communication, we find that pro-active communication with stakeholders from the private sector (e.g., business owners or chief executive officers) to promote voluntary safety protocols in enterprises, businesses, event organization, government administrations, etc., shows a significant effect in each of the four analyses, mainly when implemented early. Three out of four approaches also indicate a substantial impact of public health communication strategies (i.e., non-binding NPIs) encouraging citizen engagement and empowering them with information. The voluntary promotion of the use of face masks is also an efficient risk communication strategy. To better understand this, we performed an in-depth assessment of the impact of NPIs related to face masks. Masks are captured in total in three different interventions: the first one aims to increase their availability to health workers (increase the availability of PPE), which not only shows a protective effect for the personnel but also contributes to curbing the spread of the disease by diminishing the role of hospitals as sources of infection,  $\Delta R_t = -0.07(1)$ . The two other

mask-related NPIs concern the use of face masks in the general population. Some governments have actively promoted the wearing of masks through information campaigns on respiratory etiquette. This measure was typically implemented early in the epidemic (on average, three days after reaching 30 cases). Other countries have enacted the use of masks as mandatory, generally at later stages of the epidemic (22 days after 30 cases), often accompanied by information campaigns (and sometimes enforced by police sanctions). The early promotion of the use of face masks shows a significant effect ( $\Delta R_t = -0.19(2)$ ), whereas late mandatory use appears to have an attenuated impact ( $\Delta R_t = -0.13(3)$ ). This picture suggests that face masks are useful [\[4\]\[25\]](#) in particular when they are immediately available (as stocks for example) for health workers and the public, making it possible to promote their general use. Many European countries first had to procure masks before establishing their usage mandatory to enforce compliance [\[26\]](#). This circumstance might have reduced their effectiveness.

**Resource allocation.** Measures for resource allocation show limited impacts on  $R_t$  in our analysis (e.g., police and army interventions being insignificant in all studies) with relatively high entropy, meaning that country-level effects are important. Surprisingly, the implementation of crisis management plans turns out to be highly effective, except for the Americas. After removing countries from North and South America from the analyses, all four of our methods agree on significant effects of crisis management plans with an  $\Delta R_t$  of down to  $-0.3$ , suggesting a lack of *effective* crisis plans in American territories. For instance, US states had to focus on providing health insurance and economic stimulus as well as facilitating administrative procedures, while European countries could develop their plans on top of a stronger socio-economic basis [\[27\]\[28\]](#). Crisis management plans are

also more effective in countries with a non-participatory government, meaning that countries with increasingly authoritarian practices might be at an advantage at implementing such policies, as can be seen in the swift response of Singapore<sup>29</sup>.

**Case identification, contact tracing and related measures.** NPIs related to case identification and contact tracing show some of the lowest effectiveness ranks and in some cases even increase  $R_t$ , consistently across most countries (NPIs with the five lowest entropy scores all belong to this theme). This result is to be expected, as, e.g., increased testing and faster contact tracing will on the short-run increase the numbers of found cases in return for reduced numbers in the long run. We do not assess such long-term effects (over timespans of more than a month) in the current work. Furthermore, note that our analysis considers mostly data from March and April 2020 where many countries experienced surges of case numbers that most likely hindered effective contact tracing and other case identification measures. This also applies to the relative ineffectiveness of quarantining people who either are infected or were exposed to infected persons, while the promotion of self-isolation of people with symptoms belonged to one of the most effective NPI. This result confirms a tendency in our results where voluntary measures are more effective than similar mandatory ones.

**Strengths & Limitations.** The assessment of the effectiveness of NPIs is statistically challenging, as measures were typically implemented simultaneously and because their impact might well depend on the particular implementation sequence. Our four methodological approaches are susceptible to resulting biases in different ways. While some methods might be prone to overestimating effects from an NPI due to insufficient adjustments for confounding effects from other measures, other

methods might underestimate the contribution of an NPI by assigning its impact to a highly correlated NPI. As a consequence, estimates of  $\Delta R_t$  might vary substantially across different methods, whereas the agreement on the significance of individual NPIs is much more pronounced. The strength of our study, therefore, lies in the harmonization of these four independent methodological approaches, combined with the usage of an extensive data set on NPIs. This study design substantially reduces the risk of idiosyncratic results due to model biases. Moreover, whereas previous studies often subsumed a wide range of social distancing and travel restriction measures under a single entity, our analysis contributes to a more fine-grained understanding of each NPI.

It is also essential to highlight the limitations of our approach. The CCCSL data set features non-homogeneous data quality and completeness across the different territories and data collection could be biased by the data collector (native versus non-native) as well as the information communicated by governments. Moreover, the coding system presents some drawbacks, notably because some interventions could belong to more than one category but are only recorded once. Compliance with NPIs is crucial for their effectiveness, yet we assumed a comparable degree of compliance by each population. Additionally, we neither took into account the stringency of NPI implementation nor potential variations of NPI effectiveness over time, except for the dependency on the epidemic age of its adoption.

To compute  $R_t$ , we used time-series of the number of confirmed COVID-19 cases<sup>30</sup>. This approach may over-represent patients with severe symptoms and may be biased by variations in testing and reporting policies among countries. We assumed a constant serial interval (average

time-span between primary and secondary infection). However, this number shows considerable variations in the literature<sup>[31]</sup> and depends on measures such as social distancing and self-isolation.

Our analysis provides a large-scale quantification of the effectiveness of different NPIs in mitigating the transmission of COVID-19. The consensus displayed by the four different methods guarantees the robustness of the results.

## 4 Conclusions

Here we presented the outcome of an extensive analysis on the impact of 4,579 individual NPIs ( $N = 53$ ) on the effective reproduction number  $R_t$  of COVID-19 in 76 territories worldwide. The adoption of the CCCSL data set<sup>[20]</sup> of NPIs, makes of our study the largest on NPI effectiveness to date<sup>[10,19,32,33]</sup>.

Our study dissects the entangled packages of NPIs<sup>[20]</sup> and gives new insights into their effectiveness. Our findings suggest that there is no silver bullet to efficiently reduce the burden of a potential second COVID-19 wave or any similar future viral respiratory epidemics through NPIs. Instead, we identify several decisive interventions that significantly contribute to reducing  $R_t$  below one, though none of these interventions alone would be enough to stop the epidemic. At the global level, our results reveal a worldwide consensus rank of the NPIs based on their effectiveness in mitigating the spread of COVID-19. For instance, i) social distancing, ii) travel restrictions, and iii) healthcare and public health capacity (e.g., reduce the burden on the healthcare system by encouraging self-initiated isolation of people symptoms) have a particularly strong effect on the reduction of  $R_t$ . This finding

is in line with results from other studies which used different statistical approaches, epidemiological metrics, geographic coverage, and classifications of NPIs [\[27-13\]](#). More importantly, the possibility to focus the analysis on individual countries, reveals that the efficacy of individual NPIs strongly varies across countries and world regions, and in relation to human and economic development as well as different dimensions of governance. This finding is significant because it implies that the impact of specific NPIs in a particular area is the complex outcome of the non-trivial combination of socio-economic features and the NPIs already adopted. The dependency on the local context is not surprising, and it points to a high heterogeneity across countries and a non-independence among the different NPIs. Another source of complexity is represented by the dependency on the effectiveness of each NPIs on the epidemic age of its adoption. In simple words, the same NPI in the same country can have a drastically different impact if taken early or later on.

The emerging picture is one in which no one-fits-all solution exists, and no single NPI alone can decrease  $R_t$  below one. Instead, in the absence of a vaccine, a resurgence of COVID-19 cases can only be stopped by a suitable combination of NPIs, each tailored to the specific country and its epidemic age. These measures must be enacted together — and with the best timing — to be maximally effective on the spread of COVID-19 and enable a faster re-opening.

One of the consequences of this picture is that NPIs considerably less intrusive and less costly than lockdowns could be highly effective, such as specific risk communication strategies and voluntary measures that strengthen the healthcare system. In fact, we found several instances where non-binding governmental guidelines strongly outperformed their mandatory counterparts

(e.g., masks, self-isolation, work safety). These results call for a strong effort to simulate "what-if" scenarios at the country level for planning the most likely effectiveness of future NPIs, and, thanks to the possibility to go down to the level of single countries and specific local contexts, our approach is the first contribution to this end.

## References

1. N. L. Qualls *et al.*, "Community mitigation guidelines to prevent pandemic influenza — United States, 2017," *MMWR Recommendations and reports*, vol. 66, no. 1, 2017.
2. H. Tian, Y. Liu, Y. Li, C. H. Wu, B. Chen, *et al.*, "An investigation of transmission control measures during the first 50 days of the COVID-19 epidemic in China," *Science*, vol. 368, no. 6491, pp. 638–642, 2020.
3. S. Chen, J. Yang, W. Yang, , C. Wang, and T. Bärnighausen, "COVID-19 control in China during mass population movements at New Year," *The Lancet*, vol. 395, no. 10226, pp. 764–766, 2020.
4. D. K. Chu *et al.*, "Physical distancing, face masks, and eye protection to prevent person-to-person transmission of SARS-CoV-2 and COVID-19: a systematic review and meta-analysis," *Lancet*, vol. 6736, no. 20, pp. 1–15, 2020.
5. B. Pfefferbaum and C. S. North, "Mental health and the covid-19 pandemic," *New England Journal of Medicine*, vol. 0, no. 0, p. null, 0.

6. Johns Hopkins University of Medicine, “COVID-19 dashboard by the Center for Systems Science and Engineering (CSSE) at Johns Hopkins University of Medicine.” (Accessed: 2020-06-04).
7. M. Chinazzi *et al.*, “The effect of travel restrictions on the spread of the 2019 novel coronavirus (COVID-19) outbreak.,” *Science*, vol. 368, no. 6489, pp. 395–400, 2020.
8. A. Arenas, W. Cota, C. Granell, and B. Steinegger, “Derivation of the effective reproduction number R for COVID-19 in relation to mobility restrictions and confinement,” *medRxiv*, 2020.
9. N. Banholzer *et al.*, “Estimating the impact of non-pharmaceutical interventions on documented infections with COVID-19: A cross-country analysis,” *medRxiv*, 2020.
10. S. Flaxman *et al.*, “Estimating the effects of non-pharmaceutical interventions on COVID-19 in Europe,” *Nature*, Jun 2020.
11. A. Teslya *et al.*, “Impact of self-imposed prevention measures and short-term government intervention on mitigating and delaying a COVID-19 epidemic,” *medRxiv*, 2020.
12. J. Wang, K. Tang, K. Feng, and W. Lv, “When is the COVID-19 Pandemic Over? Evidence from the Stay-at-Home Policy Execution in 106 Chinese Cities,” *SSRN*, 2020.
13. J.-P. R. Soucy *et al.*, “Estimating effects of physical distancing on the covid-19 pandemic using an urban mobility index,” *medRxiv*, 2020.



14. K. Prem, Y. Liu, *et al.*, “The effect of control strategies to reduce social mixing on outcomes of the COVID-19 epidemic in Wuhan, China: a modelling study,” *The Lancet Public Health*, vol. 5, no. 5, pp. e261–e270, 2020.
15. M. U. Kraemer *et al.*, “The effect of human mobility and control measures on the COVID-19 epidemic in China,” *Science*, vol. 497, no. 6490, pp. 493–497, 2020.
16. M. Gatto *et al.*, “Spread and dynamics of the COVID-19 epidemic in Italy: Effects of emergency containment measures,” *PNAS*, vol. 117, no. 19, pp. 10484–10491, 2020.
17. L. Lorch, W. Trouleau, S. Tsirtsis, A. Szanto, B. Schölkopf, and M. Gomez-Rodriguez, “A spatiotemporal epidemic model to quantify the effects of contact tracing, testing, and containment,” *arXiv*, 2020.
18. J. Dehning, J. Zierenberg, *et al.*, “Inferring change points in the spread of COVID-19 reveals the effectiveness of interventions,” *Science*, vol. 9789, no. May, pp. 1–15, 2020.
19. S. Hsiang *et al.*, “The effect of large-scale anti-contagion policies on the COVID-19 pandemic,” *Nature*, 2020.
20. A. Desvars-Larrive *et al.*, “CCCSL: Complexity Science Hub Covid-19 Control Strategies List.” <https://github.com/amel-github/covid19-interventionmeasures>, 2020. Accessed: 2020-05-15.
21. Bloomberg, “Slovene economy minister survives ouster bid over ppe scandal,” 2020. Accessed: 2020-07-02.

22. India Today, “Whiff of a scandal,” 2020. Accessed: 2020-07-02.
23. The Telegraph, “Ppe: Government counted each glove as single item to reach one billion total, investigation shows,” 2020. Accessed: 2020-07-02.
24. R. A. J. Post, M. Regis, Z. Zhan, and E. R. van den Heuvel, “How did governmental interventions affect the spread of covid-19 in european countries?,” *medRxiv*, 2020.
25. C. J. Worby and H.-H. Chang, “Face mask use in the general population and optimal resource allocation during the COVID-19 pandemic,” *medRxiv*, 2020.
26. Al Jazeera News, “Which countries have made wearing face masks compulsory?,” 2020. Accessed: 2020-06-10.
27. Business Insider, “14 countries that are paying their workers during quarantine,” 2020. Accessed: 2020-07-03.
28. BBC News, “Coronavirus bailouts: Which country has the most generous deal?,” 2020. Accessed: 2020-07-03.
29. J. E. Wong, Y. S. Leo, and C. C. Tan, “Covid-19 in singapore—current experience: critical global issues that require attention and action,” *Jama*, vol. 323, no. 13, pp. 1243–1244, 2020.
30. Johns Hopkins University of Medicine, “2019 novel coronavirus COVID-19 (2019-nCoV) data repository by Johns Hopkins CSSE.” <https://github.com/CSSEGISandData/COVID-19>. Accessed: 2020-05-20.

31. J. Griffin *et al.*, “A rapid review of available evidence on the serial interval and generation time of COVID-19,” *medRxiv*, 2020.
32. J. M. Brauner, S. Mindermann, M. Sharma, *et al.*, “The effectiveness and perceived burden of nonpharmaceutical interventions against COVID-19 transmission : a modelling study with 41 countries,” *medRxiv*, 2020.
33. C. Cheng, J. Barceló, A. S. Hartnett, R. Kubinec, and L. Messerschmidt, “Covid-19 government response event dataset (corononet v. 1.0),” *Nature Human Behaviour*, pp. 1–13, 2020.
34. S. Hochreiter and J. Schmidhuber, “Long short-term memory,” *Neural computation*, vol. 9, no. 8, pp. 1735–1780, 1997.
35. A. Cori, N. M. Ferguson, C. Fraser, and S. Cauchemez, “A new framework and software to estimate time-varying reproduction numbers during epidemics,” *American Journal of Epidemiology*, vol. 178, no. 9, pp. 1505–1512, 2013.
36. F. Valka and C. Schuler, “Estimation and interactive visualization of the time-varying reproduction number  $R_t$  and the time-delay from infection to estimation,” *preprint*, 2020.
37. “World population prospects 2019.” <https://population.un.org/wpp/DataQuery/>. Accessed: 2020-04-24.
38. “World bank international comparison program database.” <https://data.worldbank.org/indicator/NY.GDP.PCAP.PP.CD>. Accessed: 2020-04-24.

39. P. Conceicao *et al.*, *Human Development Report 2019*. United Nations Development Programme, 2019.

40. “World governance indicators.” <https://info.worldbank.org/governance/wgi/>. Accessed: 2020-04-24.

41. R. Tibshirani, “Regression shrinkage and selection via the lasso,” *Journal of the Royal Statistical Society: Series B (Methodological)*, vol. 58, no. 1, pp. 267–288, 1996.

42. J. Taylor and R. J. Tibshirani, “Statistical learning and selective inference,” *Proceedings of the National Academy of Sciences*, vol. 112, no. 25, pp. 7629–7634, 2015.

43. T. Hastie, R. Tibshirani, and J. Friedman, *The Elements of Statistical Learning: Data Mining, Inference, and Prediction*. Springer, 2009.

44. F. Pedregosa *et al.*, “Scikit-learn: Machine learning in Python,” *Journal of Machine Learning Research*, vol. 12, pp. 2825–2830, 2011.

## 5 Methods

### Data

**NPI data.** We use the publicly available Complexity Science Hub Vienna COVID-19 Control Strategies list (CCCSL) data set on NPIs<sup>[20]</sup>. Therein, NPIs are categorised using a four-level hierarchical coding scheme: L1 defines the theme of the NPI: “Case identification, contact

tracing and related measures”, “Environmental measures”, “Healthcare and public health capacity”, “Resource allocation”, “Returning to normal life”, “Risk communication”, “Social distancing” and “Travel restriction”. Each L1 (theme) is composed of several categories (L2 of the coding scheme), that contain subcategories (L3) which are further subdivided to group codes (L4). The data set covers 52 countries; data for the USA is available at the state level (24 states). This makes a total of 76 territories. The time window for which data is available varies by territory. In this analysis, we use a static version of the CCCSL, retrieved on 15 May 2020, presenting 4,579 NPIs. A glossary of the codes is provided on [github](#). For each country, we use the data until the day to which the measures have been reliably updated. NPIs that have been implemented in less than five territories are not considered, leading to a final number of 3,850 NPIs of 53 different L2 categories to be used in the analyses.

**COVID-19 case data.** To estimate the effective reproduction number  $R_t$ , and growth rates of the number of COVID-19 cases, we use time series of the number of confirmed COVID-19 cases in the 76 considered territories <sup>[30]</sup>. To control for weekly fluctuations, we smooth the time series by computing the rolling average using a Gaussian window with a standard deviation of two days, truncated at a maximum window size of 15 days.

**Regression techniques.** We apply four different statistical approaches to quantify the impact of a NPI  $M$  on the reduction of  $R_t$  (see details in the Supplementary Information).

**Case-control analysis.** The case-control analysis (CC) considers each single category (L2)

or subcategory (L3)  $M$  separately and compares the difference  $\Delta R_t$  in the  $R_t$  between all countries that implemented  $M$  (cases) with those that did not implement it (controls) during the observation window. The comparison is made via a linear regression model adjusting for (i) epidemic age (days after the country has reached 30 confirmed cases), (ii) the value of  $R_t$  before  $M$  takes effect, (iii) total population, (iv) population density, (v) the total number of NPIs implemented and (vi) number of NPIs implemented in the same category as  $M$ . With this design, we investigate the time delay of  $\tau$  days between implementing  $M$  and observing  $\Delta R_t$ , as well as additional country-based covariates that quantify other dimensions of governance and human and economic development. Estimates for  $R_t$  are averaged over delays between 1 and 28 days.

**Step function Lasso regression.** In this approach, we assume that without any intervention,

the reproduction factor is constant and deviations from this constant are caused by a time-delayed onset of each NPI on L2 (categories) of the hierarchical data set. We use a Lasso regularization approach combined with a meta parameter search to select a reduced set of NPIs that best describe the observed  $\Delta R_t$ . Estimates for the changes of  $\Delta R_t$  attributable to NPI  $M$  are obtained from country-wise cross-validation.

**Random forest regression.** We perform a random forest (RF) regression, where the NPIs

implemented in a country are used as predictors for  $R_t$ , time-shifted  $\tau$  days into the future. Here,  $\tau$  accounts for the time delay between implementation and onset of the effect of a given NPI. Similar

to the Lasso regression, the assumption underlying the random forest approach is that without changes in interventions, the effective reproduction number in a country remains constant. But contrary to the two methods described above, the random forest represents a nonlinear model, meaning that the effects of individual NPIs on  $R_t$  do not need to add up linearly. The importance of a NPI is defined as the decline in the predictive performance of the random forest on unseen data if the data concerning that NPI is replaced by noise, also called permutation importance.

**Recurrent Neural Networks Modeling.** Recurrent neural networks (RNN) built using Long Short-Term Memory (LSTM) cells<sup>34</sup> have proven to be suitable models for dynamic processes such as epidemic propagation due to their ability to recall past events. Here we use a RNN with identical input as described for the random forest regression, along with the values of  $R_t$ . The best performing network (least mean square error in country-wise cross-validation) is identified as having two hidden layers of 100 neurons, one output described by a linear output layer, and 54 inputs (corresponding to each category and  $R_t$ ). To quantify the impact of a measure  $M$  on  $R_t$ , we use the trained RNN as a predictive model and compare simulations without any measure (reference) to simulations where one measure is presented at a time to assess  $\Delta R_t$ . To reduce overfitting effects, we report results from an ensemble of RNNs trained to similar precision levels.

**Estimation of the effective reproduction number.** We use the R package EpiEstim<sup>35</sup> with a sliding time window of 7 days to estimate the time series of the effective reproduction number  $R_t$  for every country. We choose an uncertain serial interval following a probability distribution with a mean of 4.46 days and a standard deviation of 2.63 days<sup>36</sup>.

**Ranking of NPIs.** For each of the four methods (CC, Lasso regression and RNN), we rank the NPI categories in descending order according to their impact, i.e., the estimated degree to which they lower  $R_t$  or their feature importance (RF). To obtain a ranking of the eight different themes (L1) of NPIs, we sum the impacts of the 5 highest ranked categories of each theme and then rank the themes according to this cumulative impact.

**Co-implementation network.** We construct the NPI co-implementation network as previously described [20](#). If there is a statistical tendency that a country implementing NPI  $i$  also implements NPI  $j$  later in time, we draw a directed link from  $i$  to  $j$ . Nodes are placed on the  $y$ -axis according to the average epidemic age at which the corresponding NPI is implemented; they are grouped on the  $x$  axis by their L1 theme. Node colours correspond to themes. The effectiveness scores for all NPIs are rescaled between zero and one for each method; node size is proportional to the rescaled scores, averaged over all methods.

**Entropic country-level approach.** Each territory can be characterised by its socio-economic conditions and the unique temporal sequence of NPIs adopted. To quantify the NPI effect, we measure the heterogeneity of the overall rank of a NPI amongst the countries that have taken that NPI. To compare countries which have implemented different numbers of NPIs, we consider the normalised rankings, where the ranking position is divided by the number of elements in the ranking list (i.e., the number of NPIs taken in a specific country). We then bin the interval  $[0, 1]$  of the normalised rankings into 10 subintervals and compute for each NPI the entropy of the distribution



of occurrences of the NPI in the different normalised rankings per country:

$$S(NPI) = -\frac{1}{\log(10)} \sum_i p_i \log(p_i), \quad (1)$$

where  $p_i$  is the probability that the considered NPI appeared in the  $i$ -th bin in the normalised rankings of all countries. To assess the confidence of these entropic values, results are compared with expectations from a temporal reshuffling of the data. For each country, we keep the same NPIs adopted but reshuffle the timestamps of their adoption.

## Acknowledgements

We thank Alexandra Roux for her contribution to the coding of the interventions recorded in the data set used in this study. We thank David Garcia, Vito D.P. Servedio, David Hofmann for their contribution in the early stage of this work. NH would like to thank Luis Haug for helpful discussions. This work was funded by the Austrian Science Promotion Agency, FFG project under 857136, the WWTF under COV 20-001, COV 20-017 and MA16-045, the Medizinisch-Wissenschaftlichen Fonds des Bürgermeisters der Bundeshauptstadt Wien under CoVid004, and the project VET-Austria, a cooperation between the Austrian Federal Ministry of Social Affairs, Health, Care and Consumer Protection, the Austrian Agency for Health and Food Safety and the University of Veterinary Medicine Vienna.

## Author contributions

NH, LG, AL, VL, PK conceived and performed the analyses. VL, ST, PK supervised the study. ED contributed additional tools. NH, LG, AL, ADL, BP and PK wrote the first draft of the paper. ADL supervised the data collection on NPIs. All authors (NH, LG, AL, ED, ADL, VL, BP, ST, PK) discussed the results and contributed to the revision of the final manuscript.

## Competing interests

The authors declare no competing interests.
